# Supplementary material for: Zonally Asymmetric Influences of the Quasi-Biennial Oscillation on Stratospheric Ozone
Source: Copernicus journal article supplement (doi:10.5194/acp-2022-174), 2022-03-29
Supplement: Supplementary file 1 [file acp-2022-174-supplement.pdf]

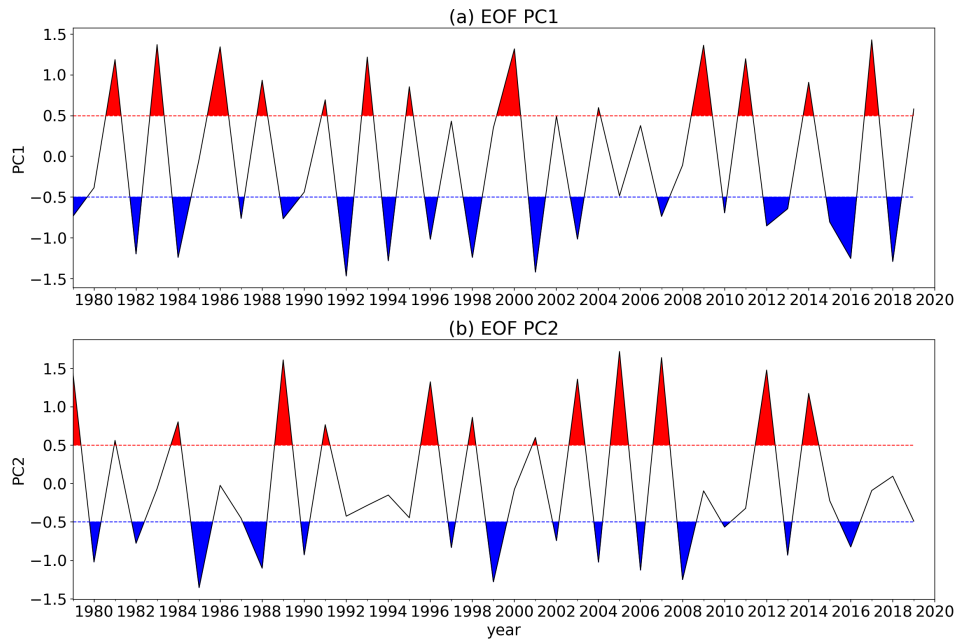

Figure S1: Time series of the QBO index in boreal winter (DJF) from 1979 to 2020, which are the first two principal components (PCs) of the EOF analysis applied to the FUB QBO data from 70 to 10 hPa. **(a)** PC1, indicating the QBO phase in the middle stratosphere at  $\sim 20$  hPa. **(b)** PC2, indicating the QBO phase in the lower stratosphere at 50 hPa. Red/blue colours are shaded where the QBO indexes are greater/less than half of its standard deviation, indicating the QBOW/QBOE phases.

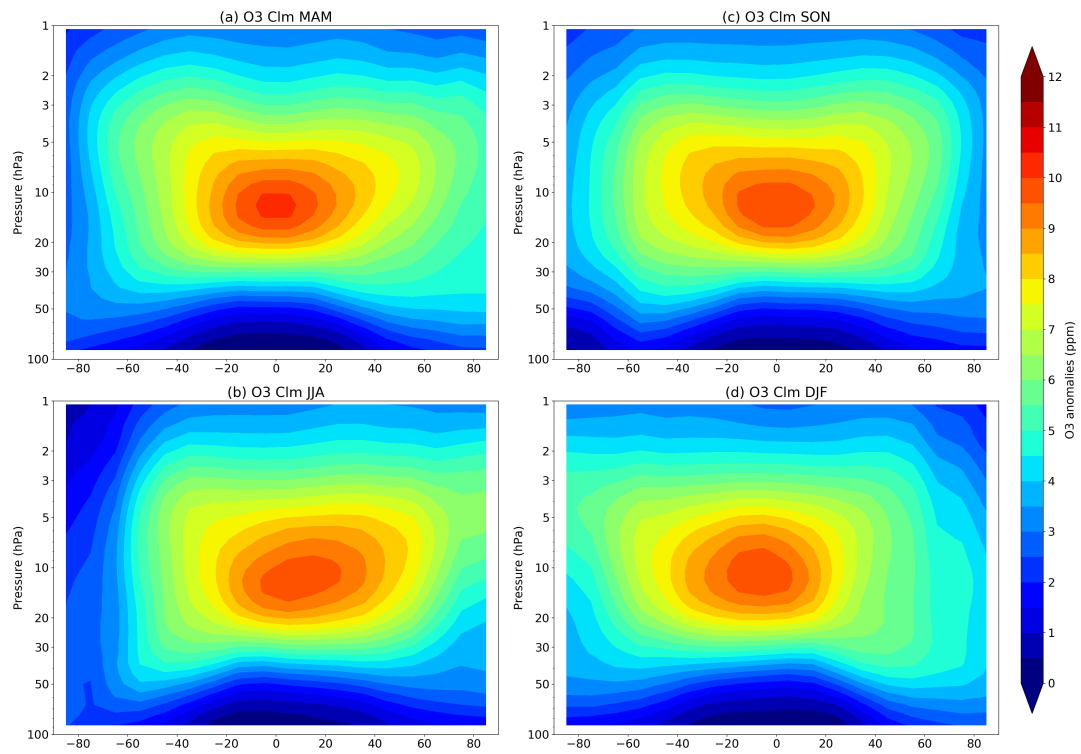

Figure S2: Latitude-height cross-section of the climatological ozone mixing ratios from the merged satellite data from C3S averaged for the period 1985-2020. (a) MAM. (b) JJA. (c) SON. (d) DJF.

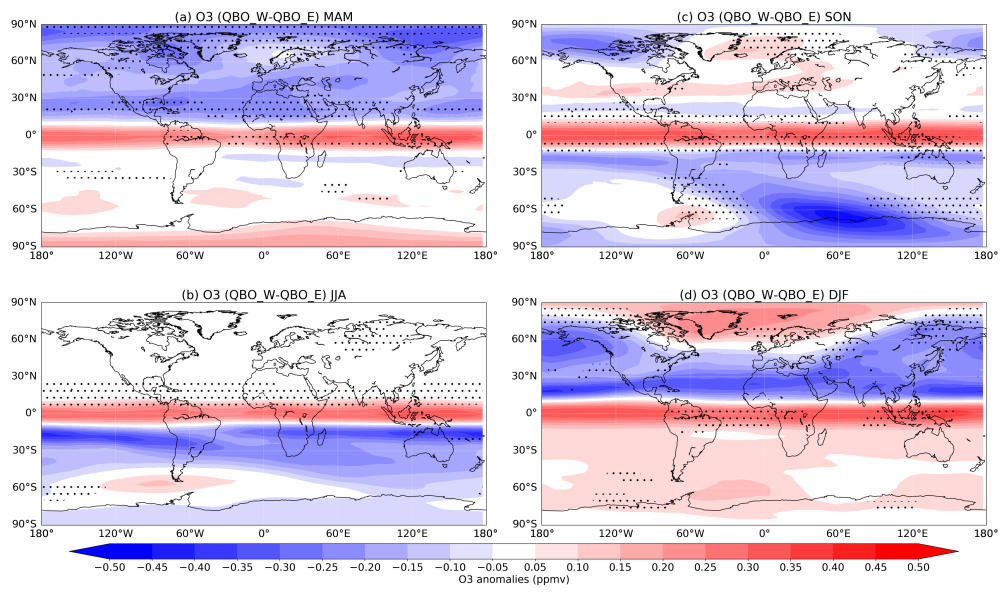

Figure S3: Influences of QBO (QBOW-QBOE) on global stratospheric ozone (10 hPa) based on ERA5 data for the period 1979-2020. **(a)** MAM. **(b)** JJA. **(c)** SON. **(d)** DJF. Stippled areas indicate results that are statistically significant over the 90% level, using the two-tailed Student's t-test.

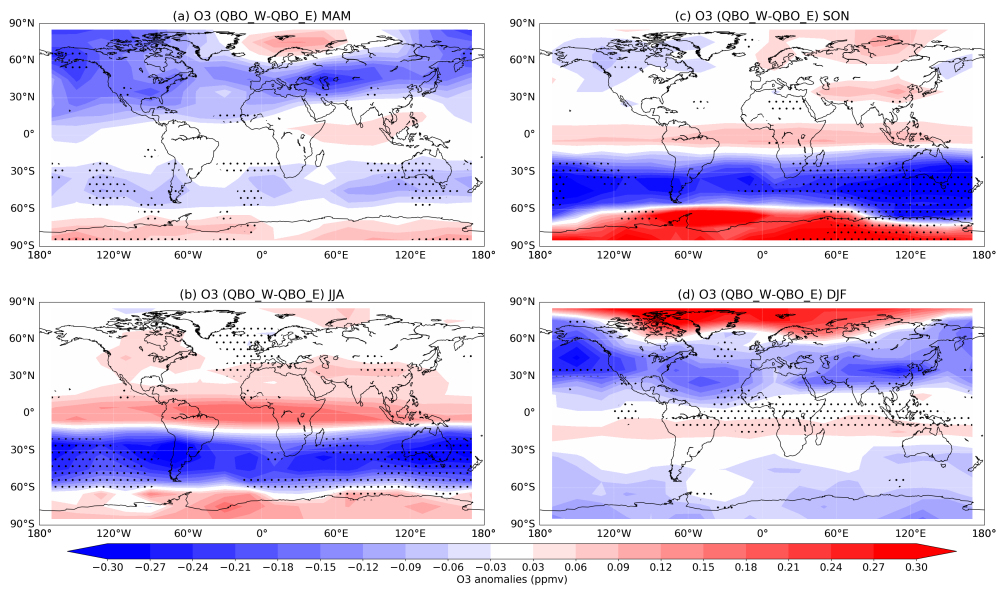

Figure S4: Influences of QBO (QBOW-QBOE) on global lower stratospheric ozone (at 50 hPa) based on merged satellite data from C3S for the period 2002-2020. (a) MAM. (b) JJA. (c) SON. (d) DJF. Stippled areas indicate results that are statistically significant over the 90% level, using the two-tailed Student's t-test.

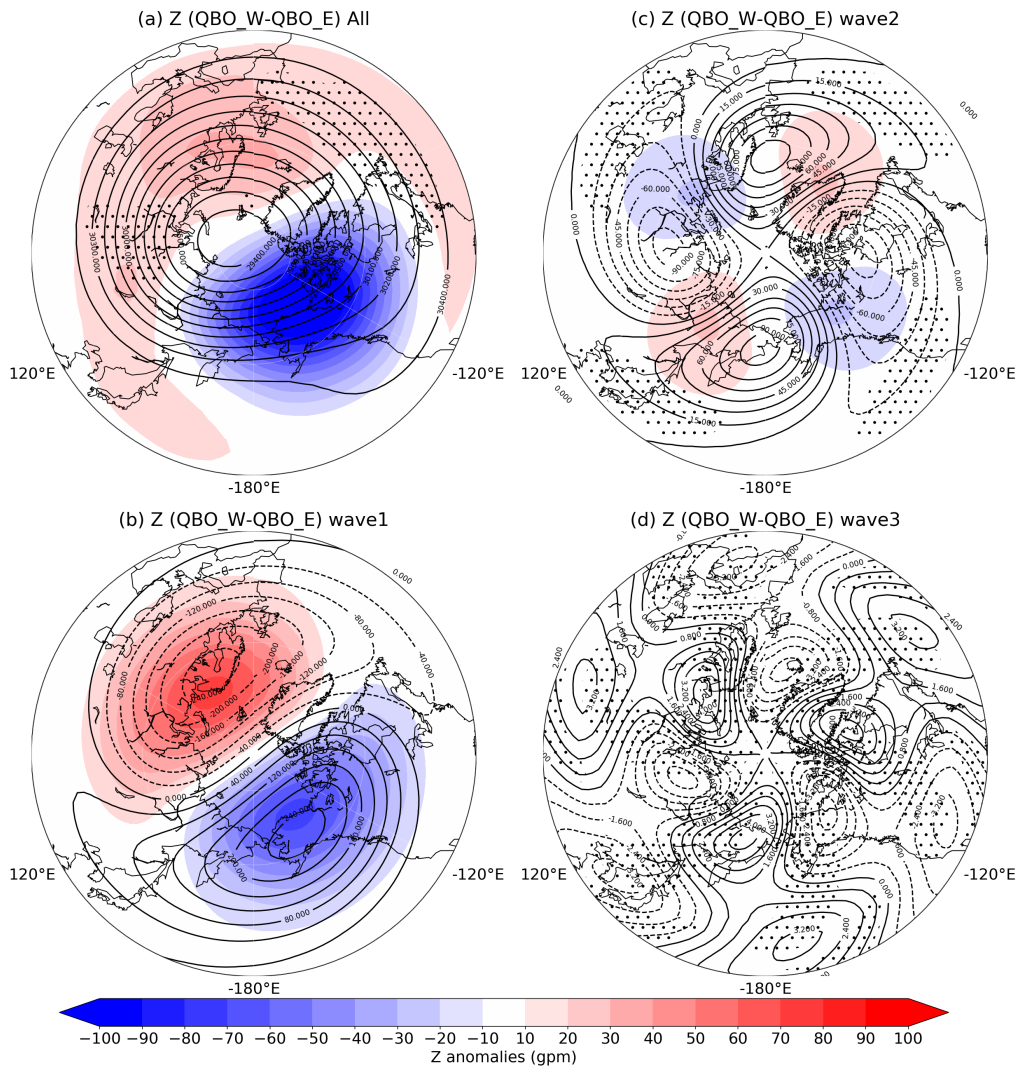

Figure S5: **(a)** Influences of QBO (QBO<sub>W</sub>-QBO<sub>E</sub>) on geopotential height (Z at 10 hPa) in the northern hemisphere autumn (SON) based on ERA5 data for the period 1979-2020. **(b-d)** The corresponding changes of geopotential height associated with QBO in wave numbers 1-3. The climatological values of geopotential height in winter as well as the climatological patterns of wave numbers 1-3 are also shown (contour lines). Stippled areas indicate results that are statistically significant over the 90% level, using the two-tailed Student's t-test.

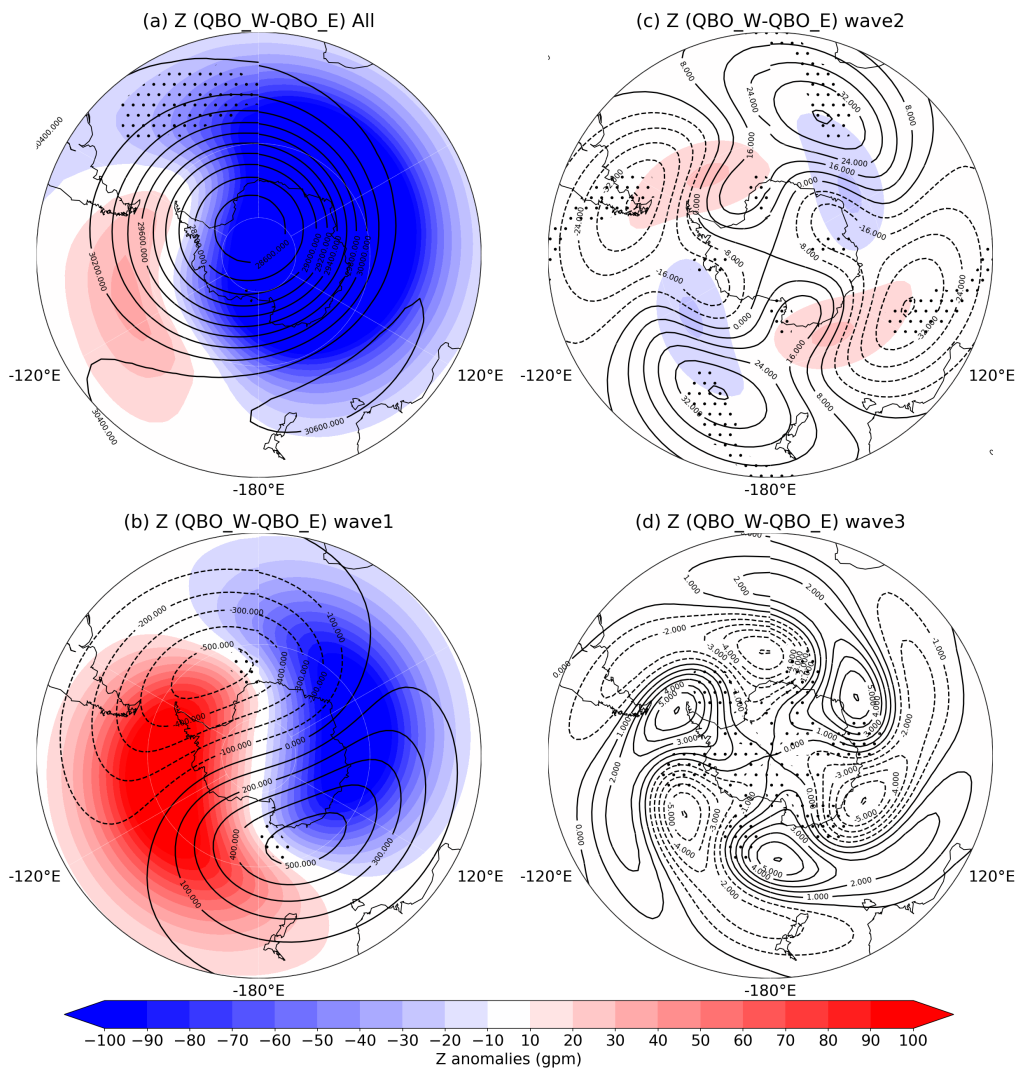

Figure S6: **(a)** Influences of QBO (QBOW-QBOE) on geopotential height (Z at 10 hPa) in the southern hemisphere spring (SON) based on ERA5 data for the period 1979-2020. **(b-d)** The corresponding changes of geopotential height associated with QBO in wave numbers 1-3. The climatological values of geopotential height in winter as well as the climatological patterns of wave numbers 1-3 are also shown (contour lines). Stippled areas indicate results that are statistically significant over the 90% level, using the two-tailed Student's t-test.
